# Supplementary material for: Phosphatase-triggered cell-selective release of a Pt(iv)-backboned prodrug-like polymer for an improved therapeutic index
Source: Royal Society of Chemistry journal article supplement (doi:10.1039/c6bm00935b), 2017-01-01
Supplement: c6bm00935b1.pdf [file c6bm00935b1.pdf]

**Supporting Information**  
**for**  
**Phosphatase-triggered cell-selective release of a Pt(IV)-backboned prodrug-like polymer for improved therapeutic index**

*Shao-Lu Li,<sup>1</sup> Yingqin Hou,<sup>1</sup> Yali Hu,<sup>1</sup> Jin Yu,<sup>1</sup> Wei Wei,<sup>2, \*</sup> and Hua Lu<sup>1, \*</sup>*

<sup>1</sup> Beijing National Laboratory for Molecular Sciences, Center for Soft Matter Science and Engineering, Key Laboratory of Polymer Chemistry and Physics of Ministry of Education, College of Chemistry and Molecular Engineering, Peking University, Beijing 100871, People's Republic of China

<sup>2</sup> State Key Laboratory of Biochemical Engineering, Institute of Process Engineering, Chinese Academy of Sciences, Beijing, 10090, People's Republic of China

Email: [chemhualu@pku.edu.cn](mailto:chemhualu@pku.edu.cn) and [weiwei@ipe.ac.cn](mailto:weiwei@ipe.ac.cn);

## Supporting Figures and Tables

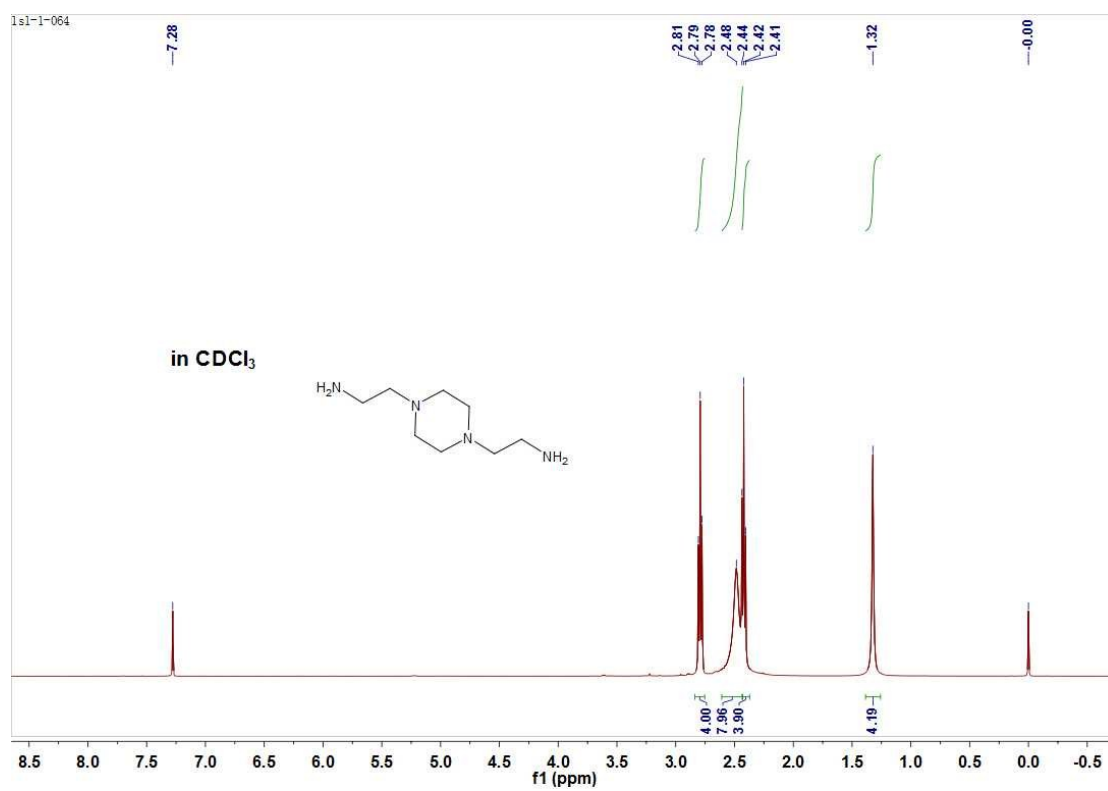

**Fig. S1.** <sup>1</sup>H NMR spectrum of DAEP in CDCl<sub>3</sub>.

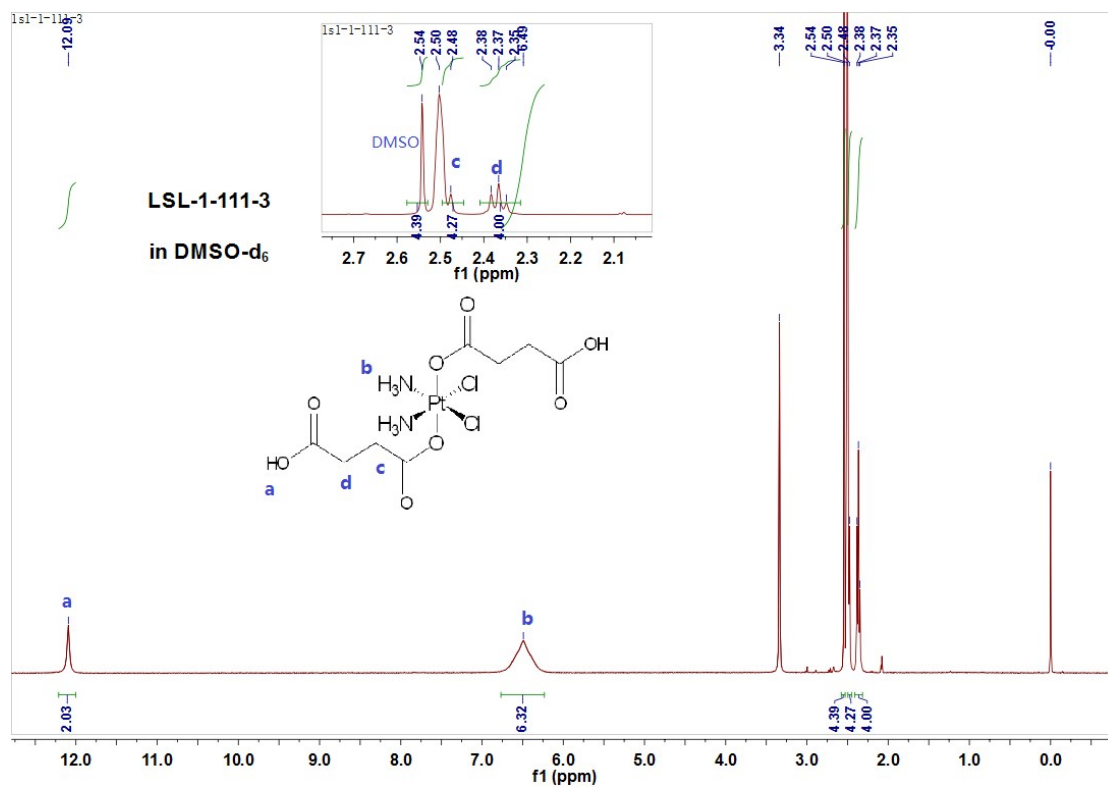

**Fig. S2.**  $^1\text{H}$  NMR spectrum of DSP in DMSO- $d_6$ .

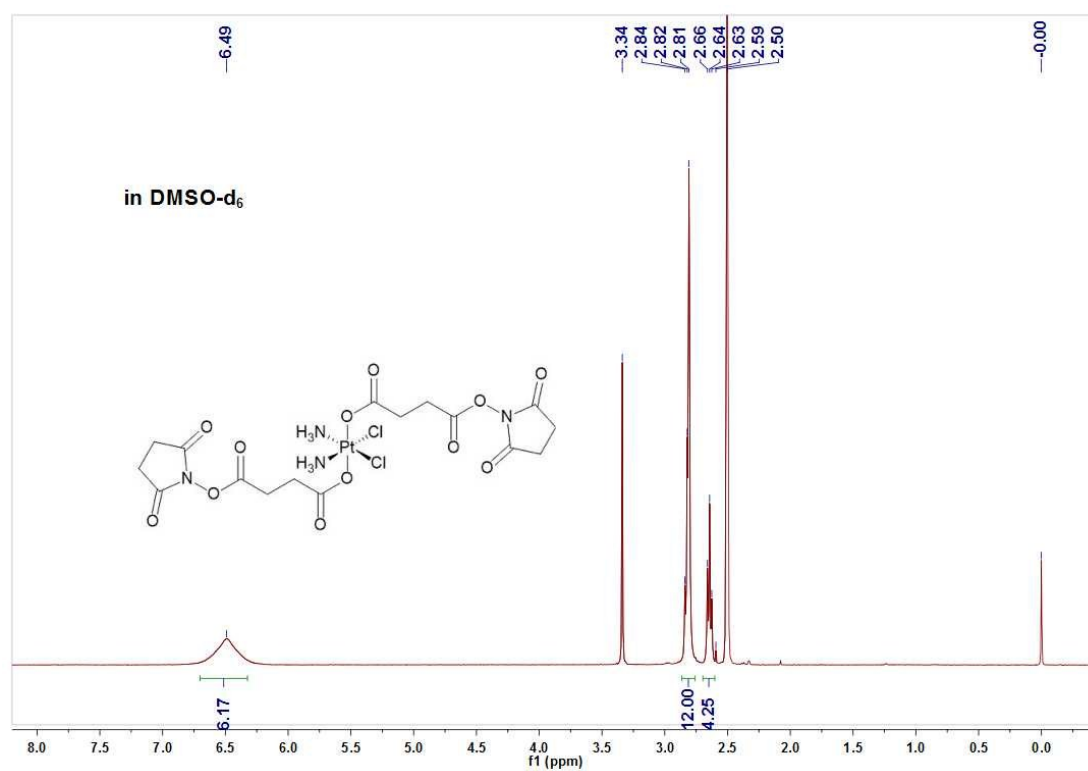

**Fig. S3.**  $^1\text{H}$  NMR spectrum of Pt-NHS in DMSO- $d_6$ .

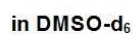

**Fig. S4.**  $^{13}\text{C}$  NMR spectrum of Pt-NHS in DMSO- $d_6$ .

## Peking University Mass Spectrometry Sample Analysis Report

### Analysis Info

Analysis Name FTMS-16060320\_Pos\_20160629\_000002.d  
Sample LSL-2-088  
Comment

Acquisition Date 6/29/2016 11:35:07 AM  
Instrument Bruker Solarix XR FTMS  
Operator Peking University

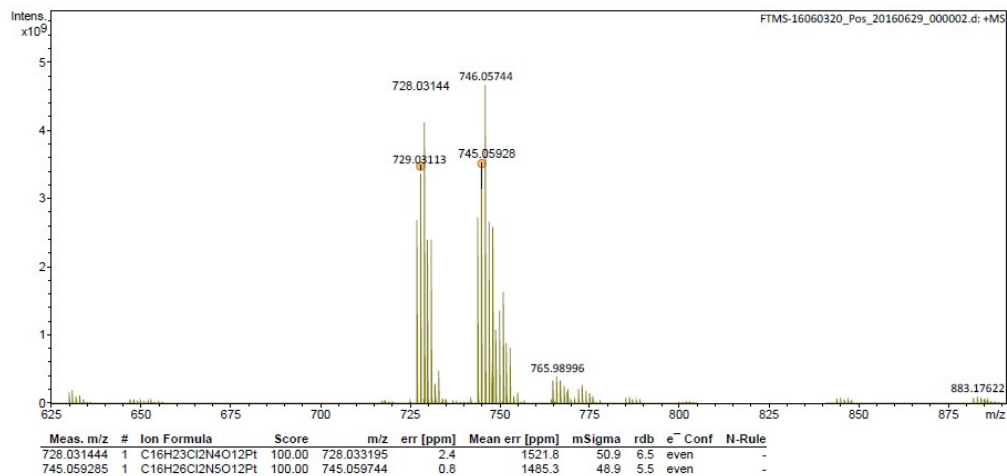

**Fig. S5.** HR-ESI-MS spectrum of Pt-NHS.

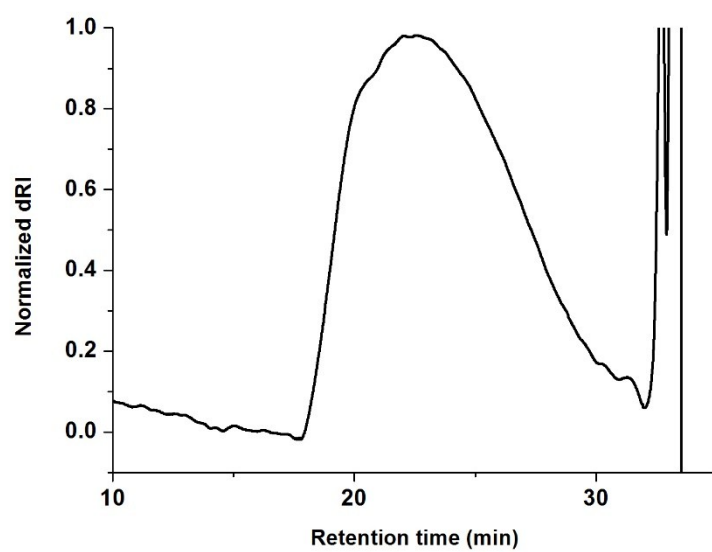

**Fig. S6.** GPC curve of P(DSP-DAEP).

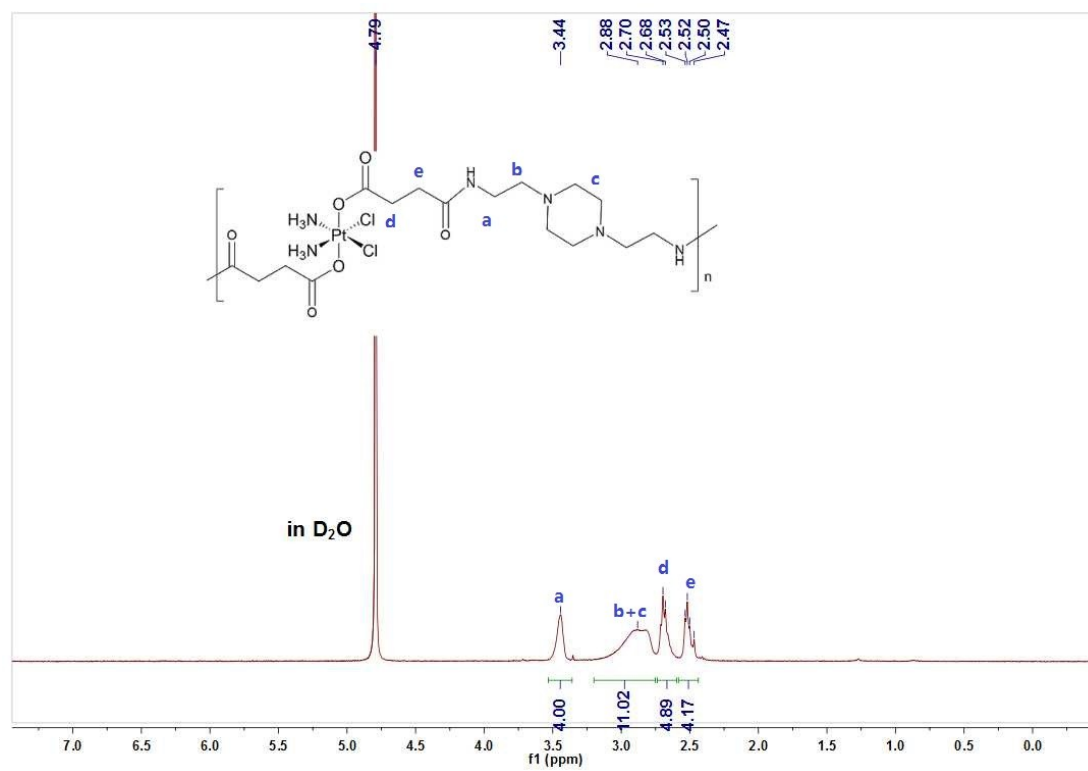

**Fig. S7.**  $^1\text{H}$  NMR spectrum of P(DSP-DAEP) in  $\text{D}_2\text{O}$ .



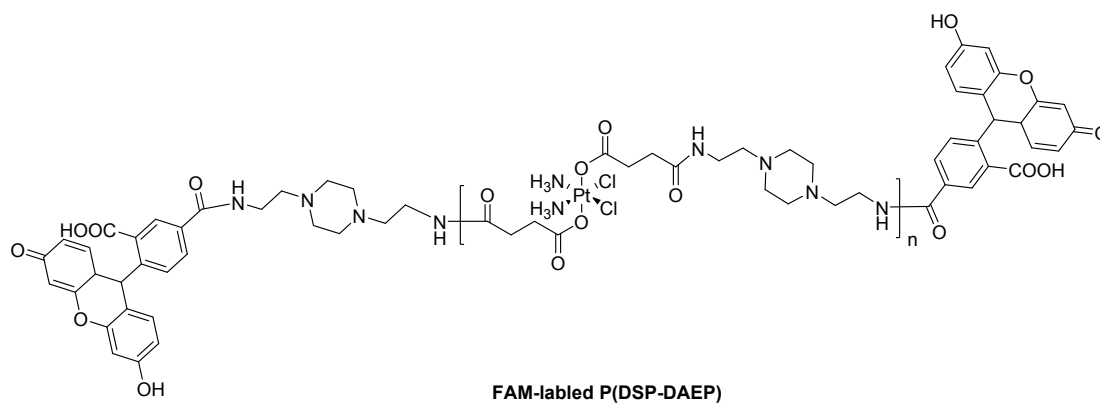

**Scheme S1.** The chemical structure of FAM-labeled P(DSP-DAEP).

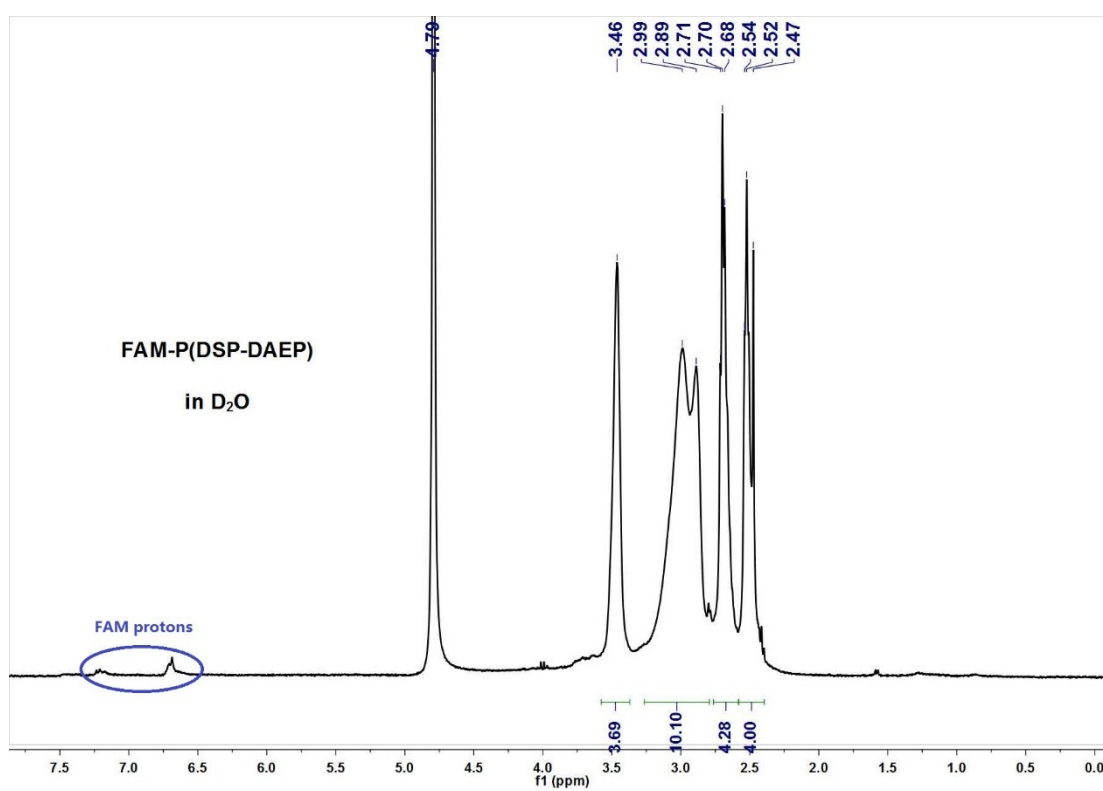

**Fig. S8.** <sup>1</sup>H NMR spectrum of FAM-P(DSP-DAEP) in D<sub>2</sub>O.

## Quantification of reductive degradation of polymer P(DSP-DAEP)

The disappearance of the methylene **a1** peak ( $\delta$  2.68 ppm) and appearance of the **a2** ( $\delta$  2.48 ppm) peak was quantified by using  $^1\text{H}$  NMR in comparison with the original polymer.

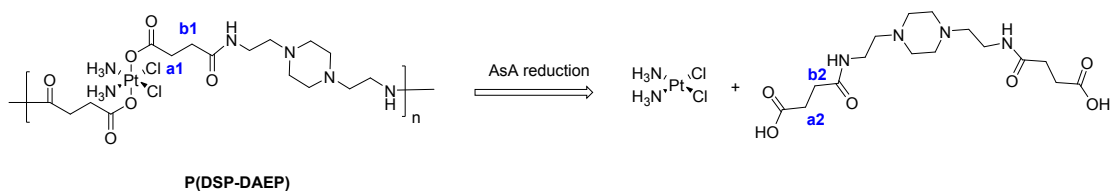

**Scheme S2.** Polymer degradation upon the ascorbic acid reduction.

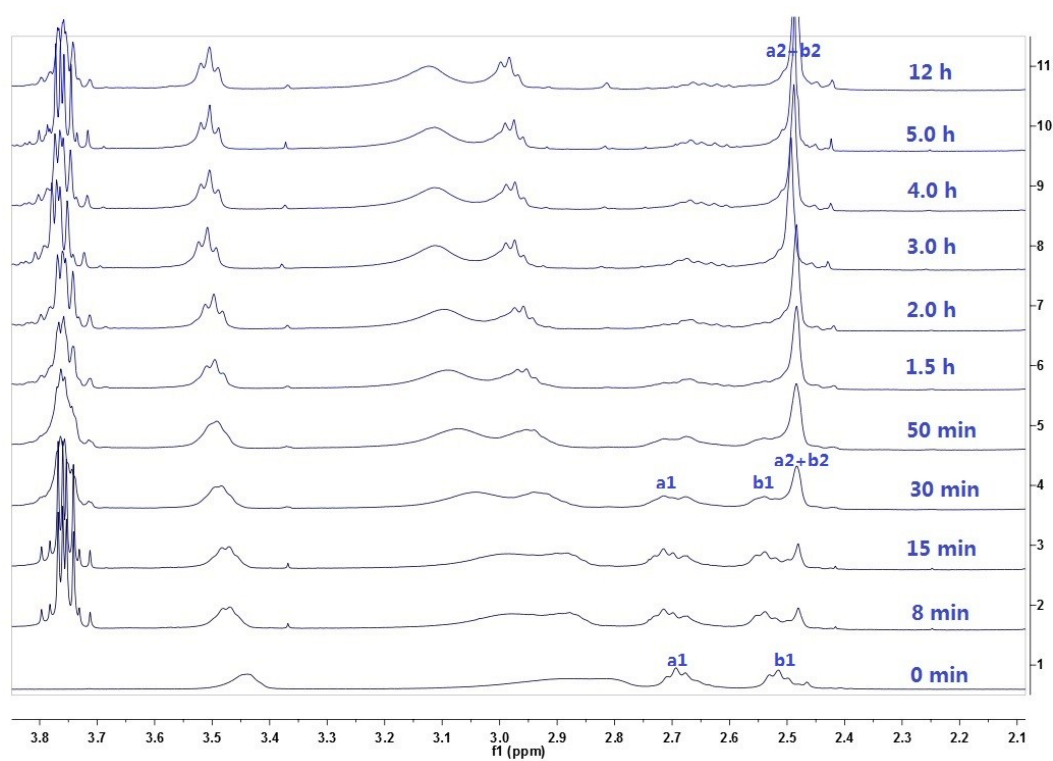

**Fig. S9.** Stacked  $^1\text{H}$  NMR spectrum of P(DSP-DAEP) with the ascorbic acid for various periods of incubation time at 37 °C.

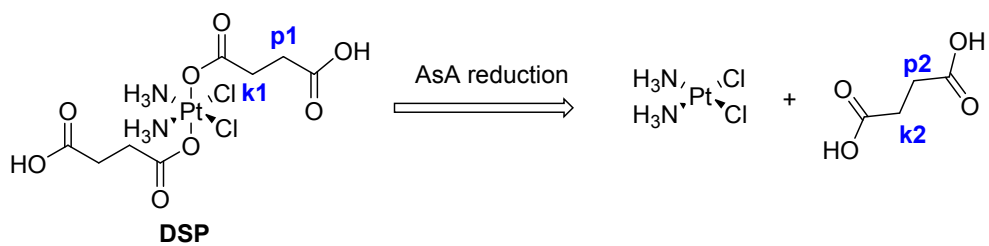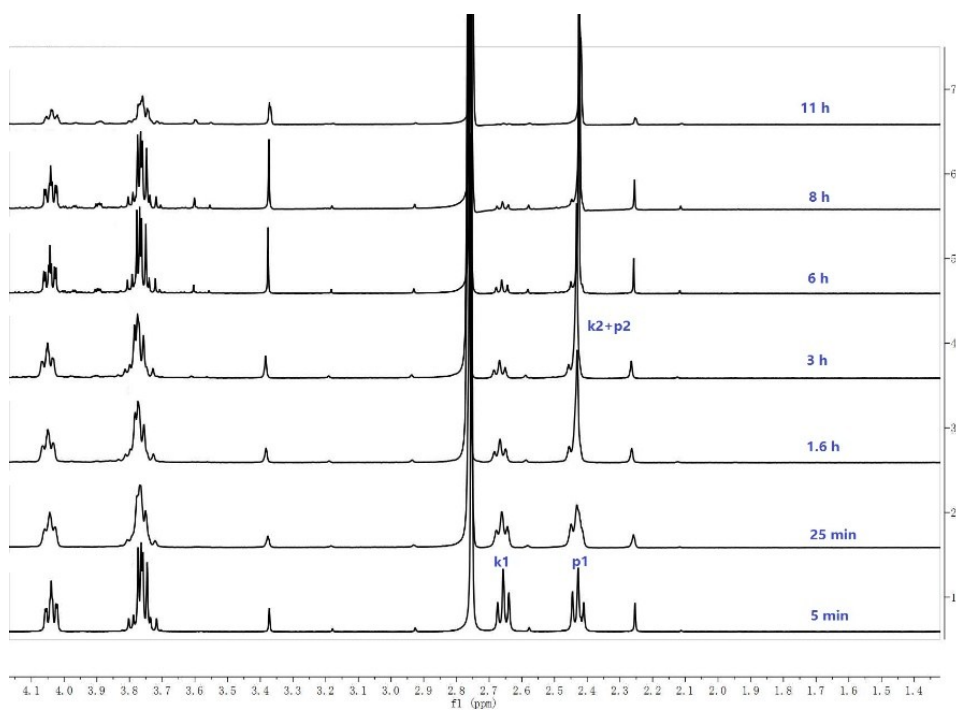

**Fig. S10.** Stacked  $^1\text{H}$  NMR spectrum of DSP with the ascorbic acid for various periods of incubation time at 37 °C.

## Electrochemistry

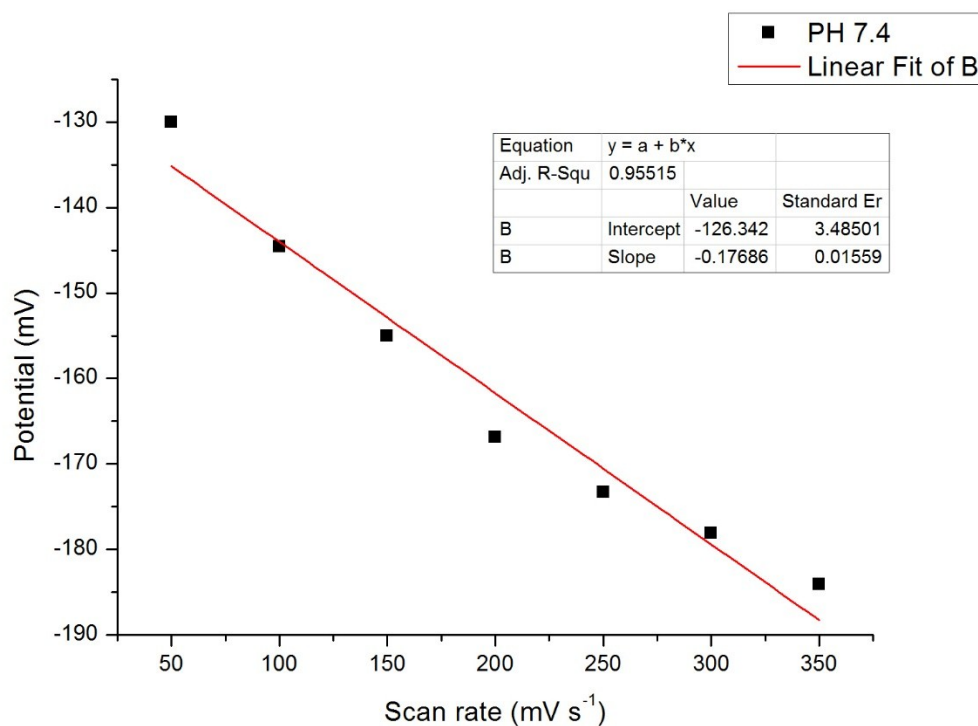

**Fig. S11.** Plot of reduction peak potential maxima of P(DSP-DAEP) at pH 7.4 as a function of scan rate.

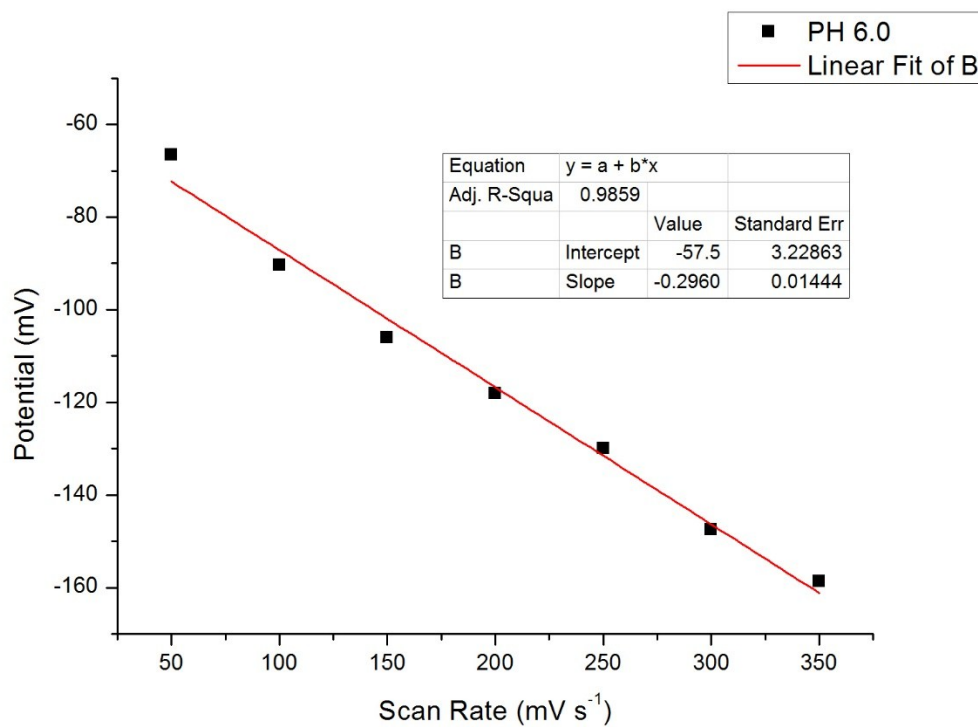

**Fig. S12.** Plot of reduction peak potential maxima of P(DSP-DAEP) at pH 6.0 as a function of scan rate.

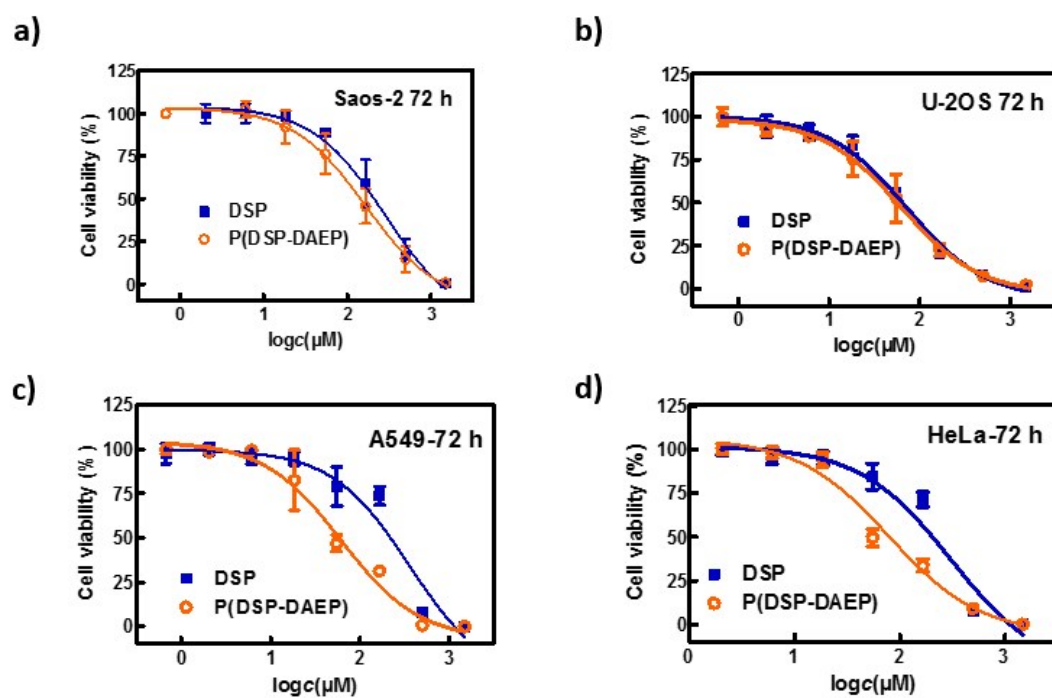

**Fig. S13.** Cell viability assays of DSP and P(DSP-DAEP) in Saos-2, U-2OS, A549 and HeLa cells.

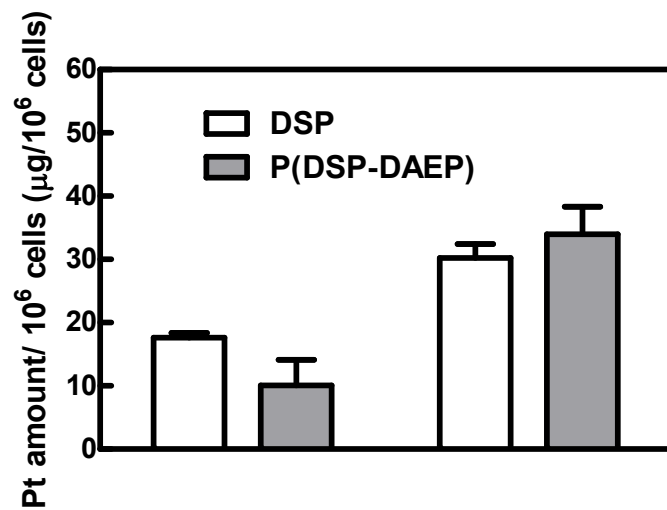

**Fig.S14.** Intracellular Pt amount of DSP and P(DSP-DAEP) in HeLa at 20  $\mu\text{M}$  and 60  $\mu\text{M}$  based on Pt at 37  $^{\circ}\text{C}$  incubated for 3 h.

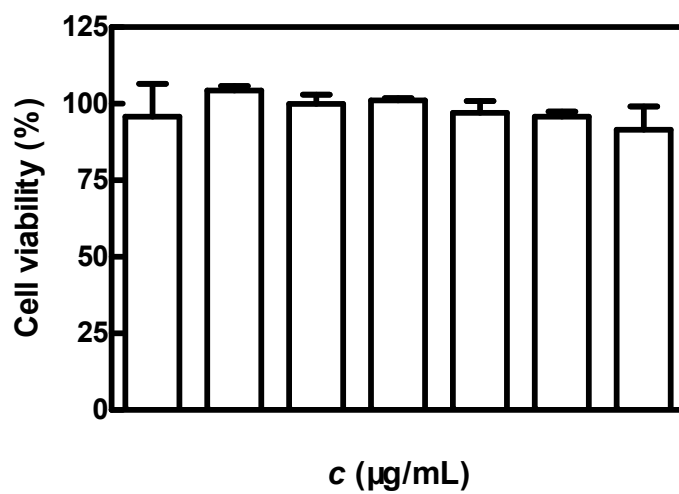

**Fig. S15.** Cell viability assay of DAEP in HeLa for 72 h.

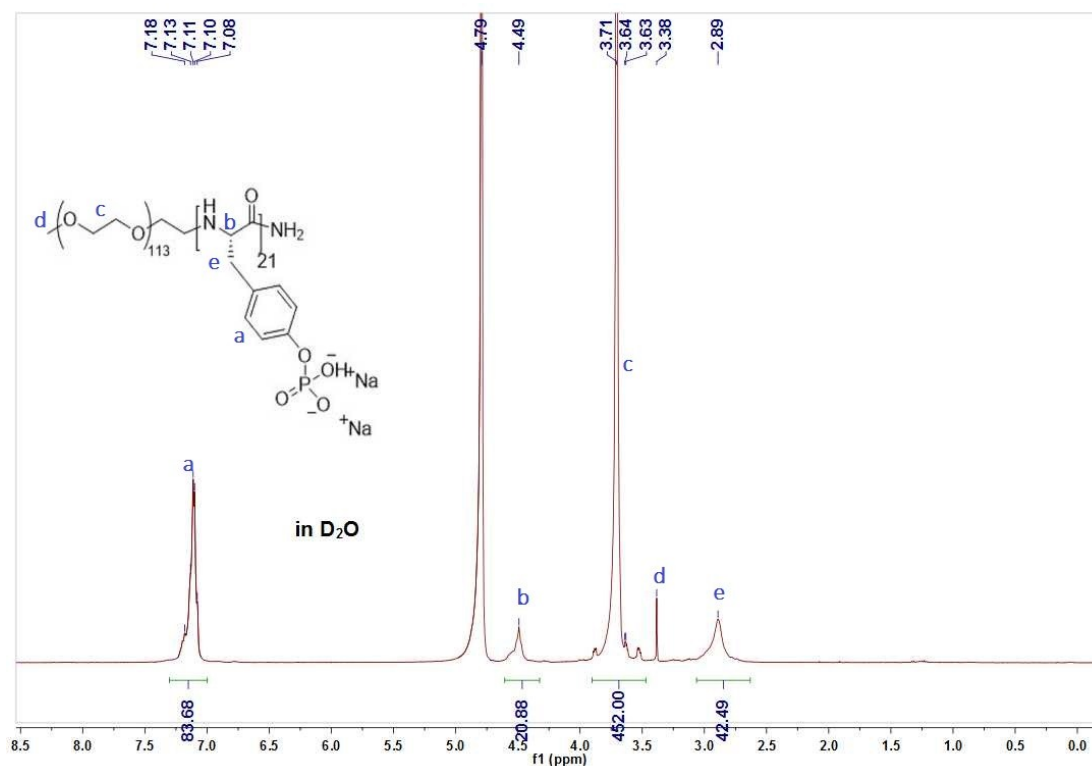

**Fig. S16.**  $^1\text{H}$  NMR spectrum of mPEG-*b*-PpY in  $\text{D}_2\text{O}$ .

**Table S1** Size and zeta potential of Pt-PIC with different feeding ratio of P/Pt

| P/Pt | Size (nm) | Zeta potential (mV) | Drug loading (%) |
|------|-----------|---------------------|------------------|
| 3:1  | 213       | -72                 | 13.1             |
| 2:1  | 178       | -71                 | 17.3             |
| 1:1  | 250       | -23                 | 21.8             |

**Table S2.** Size, zeta potential, and polydispersity index of Pt-PIC, ALP-treated Pt-PIC and ALP-treated mPEG-*b*-PpY.

|                             | Pt-PIC | ALP-treated Pt-PIC | ALP-treated mPEG- <i>b</i> -PpY |
|-----------------------------|--------|--------------------|---------------------------------|
| Eff.Diam. <sup>a</sup> (nm) | 177.9  | 56.4               | 61.7                            |
| PDI <sup>b</sup>            | 0.36   | 0.34               | 0.33                            |
| Zeta potential (mV)         | -71.2  | -28.7              | -36.3                           |

[a] Mean hydrodynamic diameters at 25 °C. [b] Polydispersity index determined by dynamic light scattering.

**Dephosphorylation process of mPEG-PpY and Pt-PIC with ALP measured by  $^{31}\text{P}$  NMR**

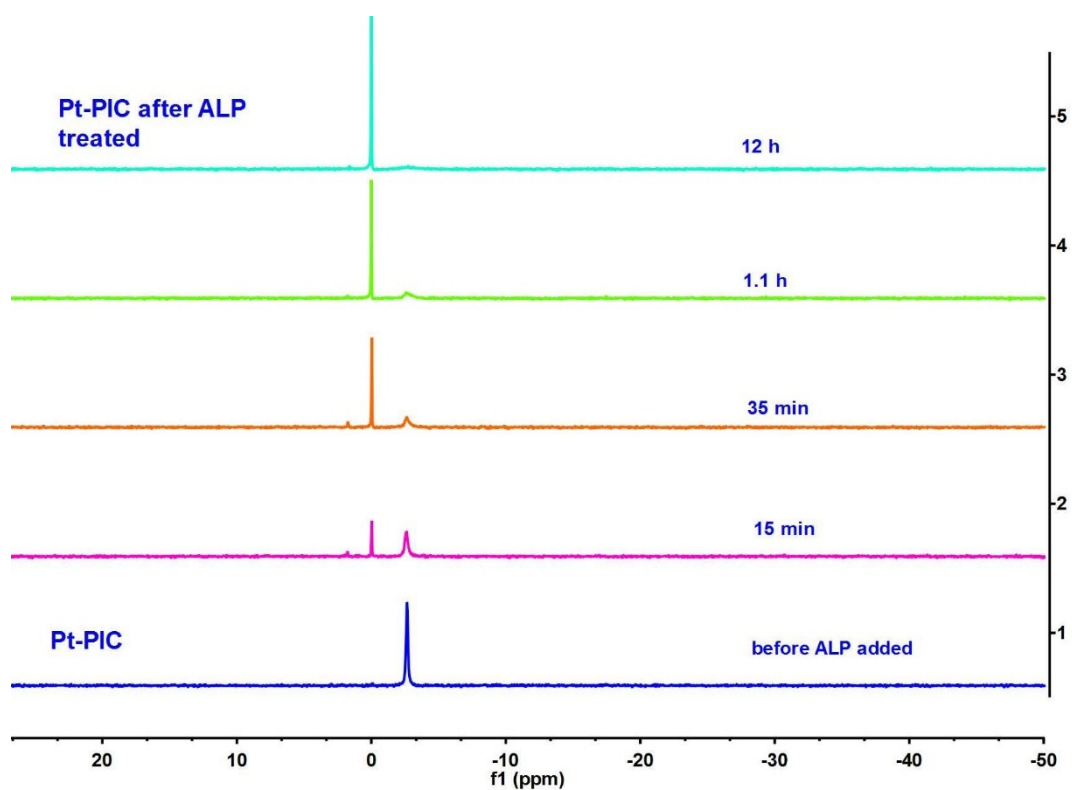

**Fig. S17.** Stacked  $^{31}\text{P}$  NMR spectrum of Pt-PIC with the treatment of ALP for various periods of incubation time at 37 °C.



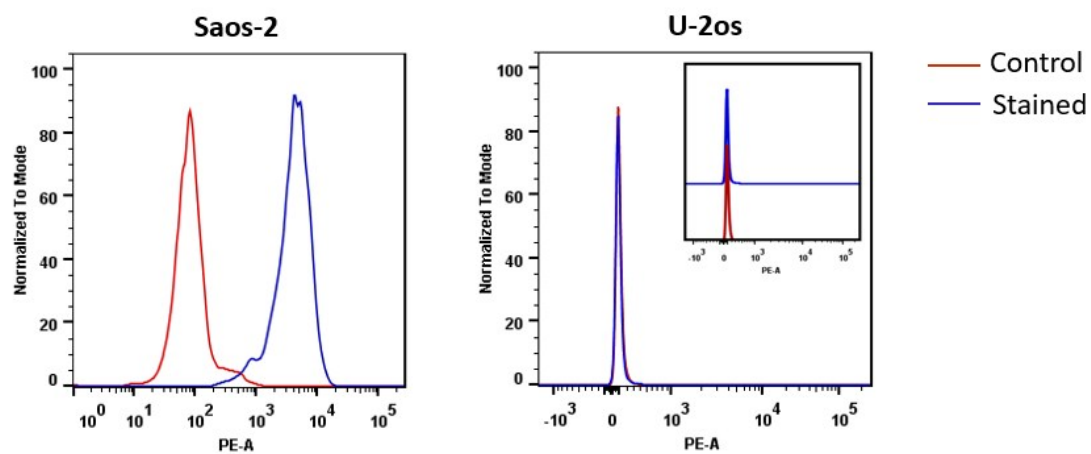

**Fig. S18.** The ALP expression levels of Saos-2 and U-2OS analyzed by flow cytometry assay.

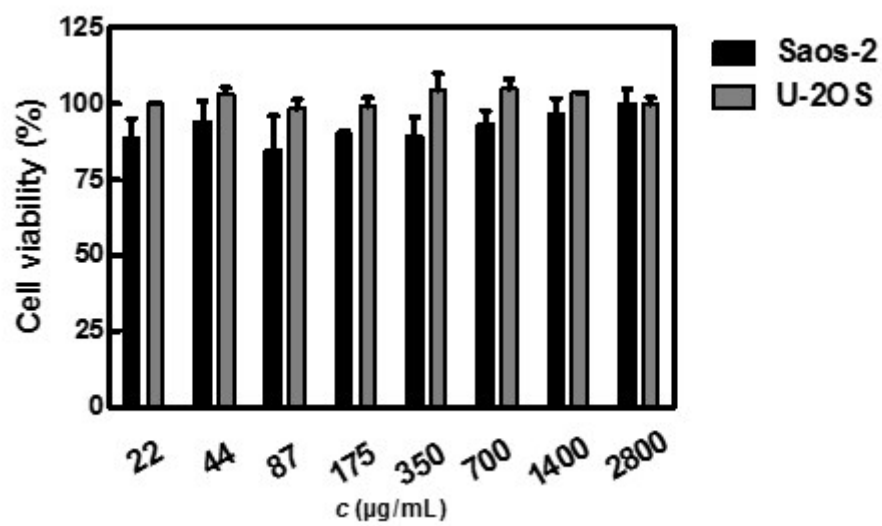

Fig. S19. Cytotoxicity of mPEG-*b*-PpY.

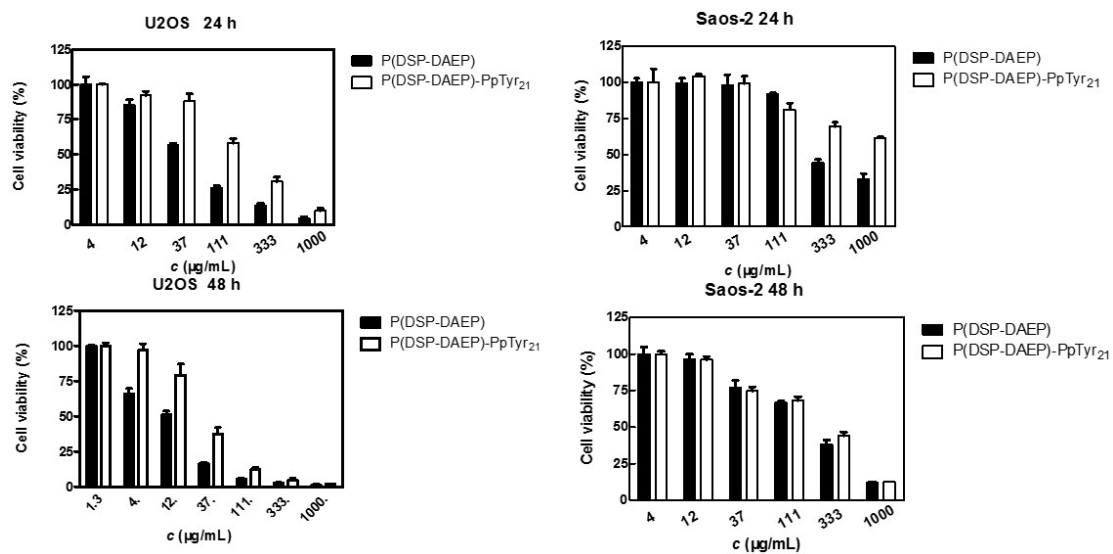

**Fig. S20.** *in vitro* cytotoxicity of P(DSP-DAEP) and Pt-PIC in Saos-2(ALP positive) and U-2OS (ALP negative) cell lines.
